# Supplementary material
Source: Springer Nature journal article supplement (https://www.springermedizin.de/resource/supplementary/13058_2005_1332_MOESM3_ESM.pdf/9698874)

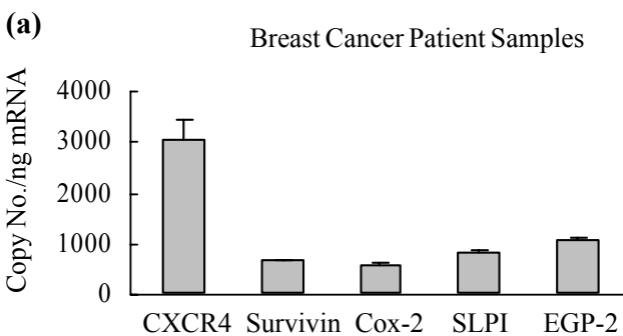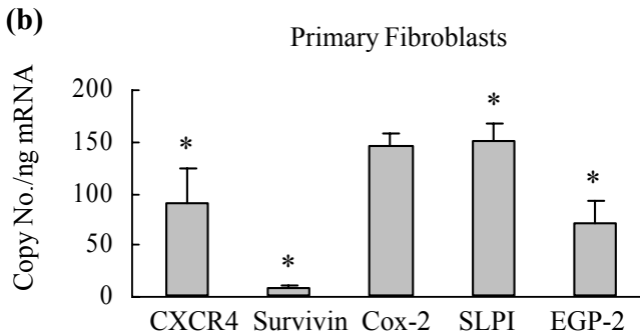

Supplement: MOESM3 [file 9698874]
